# Supplementary material
Source: bioRxiv or medRxiv preprint supplement (https://www.biorxiv.org/highwire/filestream/34073/field_highwire_adjunct_files/0/107656-1.pdf)
Supplement: Supplementary file [file 107656-1.pdf]

**Title:**

Field-based species identification in eukaryotes using real-time nanopore sequencing.

**Authors:**

Joe Parker<sup>1\*</sup>, Dion Devey<sup>1</sup>, Andrew J. Helmstetter<sup>1</sup> & Alexander S.T. Papadopoulos<sup>1\*</sup>

<sup>1</sup>Jodrell Laboratory, Royal Botanic Gardens, Kew, Richmond, Surrey UK. TW9 3AB

\*Correspondence to [a.papadopoulos@kew.org](mailto:a.papadopoulos@kew.org) and [joe.parker@kew.org](mailto:joe.parker@kew.org)

**Keywords:**

Nanopore, RTnS, MinION, onsite DNA sequencing, phylogenomics

## Supplementary Information

**Contents:**

Supplementary Methods  
Supplementary Tables  
Supplementary Discussion  
Supplementary Notes

## Supplementary Methods

**Treatment of unobserved BLAST hit data.** For reads matching a single database only, a T or F assignment was made and difference statistic calculated by masking unobserved alignment scores as 'extreme' (-1 each for length and % identities, 999 for e-value). Reads that produced no hits to either database might represent false negatives (sequencing error, or genomic regions not represented in the reference genome BLAST databases) or true negatives (sequencing contaminants and sequencer noise). To model the effect of including these nonmatching reads, dummy rows (one for each nonmatching read RTnS read: 58,629 from the *A. thaliana* experiment, and 25,660 from the *A. lyrata* experiment) were coded with 'false' labels and difference statistic values of zero. Proportions of these dummy reads were recoded with 'true' labels from 0-100% in 10% increments and classifier statistical performance was recalculated and plotted. These are shown Extended Data Figure 4 in green; where TN:FN mixtures from 0-100% TN by 10% increments shown from light to dark green shading.

## Supplementary Tables

| MinION read                                                                                    | Wickett <i>et al.</i> (2014)<br>alignment | BLASTN assignment |             |             |
|------------------------------------------------------------------------------------------------|-------------------------------------------|-------------------|-------------|-------------|
|                                                                                                |                                           | Length            | %<br>idents | E-<br>value |
| 2bbfc883-b540-40d0-a939-25d7ef4de290_Basecall_Alignment_template.snap.1 AT2G38440 no_kog_value | FNA.7457                                  | 1841              | 78.707      | 0           |
| 969907bc-ed37-41c0-a4aa-38f8f59f574e_Basecall_Alignment_template.snap.1 AT1G70070 no_kog_value | FNA.6290                                  | 1820              | 80.22       | 0           |
| aa7b4f85-8a7f-49a6-94f5-21511445c454_Basecall_Alignment_template.snap.2 AT5G55540 no_kog_value | FNA.6857                                  | 1473              | 85.064      | 0           |
| 78aa4fe7-e644-48e4-9e45-6c13c876ef36_Basecall_Alignment_template.snap.1 AT5G25070 no_kog_value | FNA.8121                                  | 1473              | 83.707      | 0           |
| afd5fe61-8b9f-41fd-849e-fe66347628e5_Basecall_Alignment_template.snap.1 AT2G05320 no_kog_value | FNA.7510                                  | 1327              | 77.995      | 0           |
| 6399de40-39c7-4a3f-987d-af2560995ff4_Basecall_Alignment_template.snap.2 AT3G50370 no_kog_value | FNA.4982                                  | 1299              | 86.143      | 0           |
| b0238c1e-fa62-4eab-bfb1-33771be23b40_Basecall_Alignment_template.snap.4 AT5G54880 no_kog_value | FNA.7601                                  | 1219              | 79.327      | 0           |
| b7dbb53d-8730-41ca-8859-fb2fce9dd3a2_Basecall_Alignment_template.snap.1 AT5G62030 no_kog_value | FNA.6807                                  | 1196              | 86.873      | 0           |
| a1bef598-15d2-4c0e-bc84-96a7535d4d5c_Basecall_Alignment_template.snap.2 AT5G41020 no_kog_value | FNA.5991                                  | 1176              | 88.095      | 0           |
| ae7825fc-6fe7-4c98-83cb-4b399b05dd49_Basecall_Alignment_template.snap.3 AT5G24260 no_kog_value | FNA.5758                                  | 1118              | 87.478      | 0           |
| 959fcf39-5c60-488a-9cfb-1d1292104451_Basecall_Alignment_template.snap.1 AT4G35870 no_kog_value | FNA.7223                                  | 1101              | 89.101      | 0           |
| 14886dbf-88fc-4b52-acc3-9dd88883fe78_Basecall_Alignment_template.snap.1 AT5G16850 no_kog_value | FNA.7056                                  | 1068              | 85.393      | 0           |
| 9be32191-63a2-4653-9f48-3046010253b8_Basecall_Alignment_template.snap.1 ATMG01360 no_kog_value | FNA.6476                                  | 990               | 86.768      | 0           |
| ed0952ad-4353-4f49-87a5-0aebcd47d6bb_Basecall_Alignment_template.snap.1 AT1G07970 no_kog_value | FNA.7418                                  | 940               | 80.638      | 0           |
| 282b79da-8c79-4438-bf70-ccf51afe1ad8_Basecall_Alignment_template.snap.2 AT5G42950 no_kog_value | FNA.6032                                  | 909               | 83.278      | 0           |
| 73cda463-e9ba-4410-9520-46a26748e332_Basecall_Alignment_template.snap.3 AT5G66840 no_kog_value | FNA.4932                                  | 864               | 83.449      | 0           |
| 7a9a13ac-d903-43ab-ab42-18e86fbc1874_Basecall_Alignment_template.snap.3 AT4G20060 no_kog_value | FNA.6092                                  | 763               | 84.273      | 0           |
| 8b3c34a2-8f0f-424a-9d57-7d12e8575f81_Basecall_Alignment_template.snap.1 AT1G12800 no_kog_value | FNA.6660                                  | 747               | 85.274      | 0           |
| 5171e626-5821-4c4a-8b0b-2bd584d82b38_Basecall_Alignment_template.snap.2 AT3G08800 no_kog_value | FNA.7511                                  | 686               | 88.047      | 0           |
| 591fe8b1-db83-4eff-a1d0-2653692b0b62_Basecall_Alignment_template.snap.5 AT4G14180 no_kog_value | FNA.7300                                  | 667               | 85.907      | 0           |
| 5d922a41-af38-4697-8467-fa4fa2836e5f_Basecall_Alignment_template.snap.1 AT1G23180 no_kog_value | FNA.5750                                  | 666               | 85.886      | 0           |

| MinION read                                                                                    | Wickett <i>et al.</i> (2014)<br>alignment | BLASTN assignment |             |           |
|------------------------------------------------------------------------------------------------|-------------------------------------------|-------------------|-------------|-----------|
|                                                                                                |                                           | Length            | %<br>idents | E-value   |
| 6bdb48cb-40c5-43af-b18f-5140ebcf8256_Basecall_Alignment_template-snap.1 AT2G35790 no_kog_value | FNA.7147                                  | 647               | 86.708      | 0         |
| 85a6e673-d25c-4d88-89ad-40c0edb9a5ee_Basecall_Alignment_template-snap.3 AT1G21710 no_kog_value | FNA.6635                                  | 645               | 93.953      | 0         |
| cb359e33-b388-40d1-8cda-e3d730373663_Basecall_Alignment_template-snap.2 AT4G00450 no_kog_value | FNA.5763                                  | 638               | 89.028      | 0         |
| df9926f0-b72f-40c8-aacb-371f480c382d_Basecall_Alignment_template-snap.1 AT5G03555 no_kog_value | FNA.6694                                  | 622               | 88.585      | 0         |
| 971fdfa-84d3-4f2f-9694-686640029e79_Basecall_Alignment_template-snap.2 AT5G24010 no_kog_value  | FNA.7313                                  | 622               | 87.942      | 0         |
| 080daa6c-7fe2-48ea-87c4-c9517fa59565_Basecall_Alignment_template-snap.1 AT3G56040 no_kog_value | FNA.7095                                  | 606               | 88.449      | 0         |
| bc1caee6-25c8-4eab-91a1-ab7862ffc422_Basecall_Alignment_template-snap.1 AT2G16630 no_kog_value | FNA.6820                                  | 599               | 90.317      | 0         |
| a404731c-5e35-4224-a7cc-b6a8bf64335c_Basecall_Alignment_template-snap.2 AT4G17098 no_kog_value | FNA.6069                                  | 589               | 88.115      | 0         |
| 556e0add-73c8-423c-a509-d6a85c4e6cb4_Basecall_Alignment_template-snap.2 AT5G66810 no_kog_value | FNA.6661                                  | 558               | 90.143      | 0         |
| 57e60607-09ce-4296-b94b-1aa52ce6d548_Basecall_Alignment_template-snap.1 AT5G20600 no_kog_value | FNA.7009                                  | 513               | 89.474      | 1.92E-178 |
| 38b082ec-ba1d-46d7-b083-b0cea62d9618_Basecall_Alignment_template-snap.1 AT2G05120 no_kog_value | FNA.5801                                  | 543               | 88.582      | 2.33E-178 |
| be5017c8-7da1-4664-8669-bf2154902685_Basecall_Alignment_template-snap.1 AT5G66550 no_kog_value | FNA.7865                                  | 557               | 87.792      | 1.64E-177 |
| 4f6b1f24-c53a-46dd-aa8d-b704bb34c980_Basecall_Alignment_template-snap.1 AT1G77720 no_kog_value | FNA.5154                                  | 638               | 85.266      | 1.64E-172 |
| 07e27975-4d98-423f-8336-4ed15e7529d7_Basecall_Alignment_template-snap.2 AT5G42400 no_kog_value | FNA.4685                                  | 745               | 82.819      | 2.46E-172 |
| e7daf9df-94a3-4cdf-8871-b0661051cbbd_Basecall_Alignment_template-snap.1 AT5G15400 no_kog_value | FNA.6240                                  | 874               | 80.778      | 9.38E-171 |
| 3fdb2a86-9d87-4719-ab0e-017e5455eb80_Basecall_Alignment_template-snap.8 AT2G26470 no_kog_value | FNA.6207                                  | 771               | 82.231      | 1.20E-170 |
| 28bd5a56-84c2-45e4-ab0b-4aac306be8f0_Basecall_Alignment_template-snap.1 AT5G39250 no_kog_value | FNA.7276                                  | 774               | 82.171      | 1.26E-169 |
| 4d5d8526-bee0-42bc-8b44-e40de8dd11dd_Basecall_Alignment_template-snap.2 AT3G02690 no_kog_value | FNA.7186                                  | 610               | 84.59       | 9.26E-158 |
| 8615b335-8244-46ab-88ea-86729453a752_Basecall_Alignment_template-snap.1 AT1G03600 no_kog_value | FNA.7396                                  | 539               | 86.085      | 3.18E-155 |
| 02bdfc7f-8c93-485e-9763-64cbfb4e6f21_Basecall_Alignment_template-snap.2 AT5G52810 no_kog_value | FNA.7115                                  | 695               | 81.583      | 1.28E-148 |
| 35997ccb-b1f7-4754-95db-4aed232a1673_Basecall_Alignment_template-snap.1 AT4G16970 no_kog_value | FNA.6779                                  | 573               | 84.119      | 1.33E-145 |
| bced7ee0-67ec-4fd4-ae3d-d3b956d4afaa_Basecall_Alignment_template-snap.2 AT1G31780 no_kog_value | FNA.6900                                  | 522               | 85.824      | 2.71E-145 |

| MinION read                                                                                    | Wickett <i>et al.</i><br>(2014) alignment | BLASTN assignment |          |           |
|------------------------------------------------------------------------------------------------|-------------------------------------------|-------------------|----------|-----------|
|                                                                                                |                                           | Length            | % idents | E-value   |
| d8704bfc-bab2-45ac-9c3b-f26861a03f15_Basecall_Alignment_template-snap.6 AT5G17690 no_kog_value | FNA.5588                                  | 782               | 79.795   | 1.63E-144 |
| 82216d1a-e320-4d9c-9d76-965aa1e237dc_Basecall_Alignment_template-snap.3 AT1G51405 no_kog_value | FNA.6950                                  | 505               | 85.941   | 2.76E-141 |
| bf0b43e8-bbf7-43b5-b3c4-cd226d590786_Basecall_Alignment_template-snap.1 AT5G07400 no_kog_value | FNA.6737                                  | 556               | 83.993   | 2.68E-135 |
| 1984cd8f-47a6-4238-854e-5a07a81263ab_Basecall_Alignment_template-snap.2 AT1G01180 no_kog_value | FNA.7667                                  | 562               | 82.918   | 1.26E-129 |
| c94f0c64-415e-4fec-856c-3bcc08ff8bb9_Basecall_Alignment_template-snap.3 AT5G18200 no_kog_value | FNA.6646                                  | 523               | 83.365   | 2.07E-123 |
| 5ef0c980-cf8a-4a16-80ac-dc0862b24e5a_Basecall_Alignment_template-snap.2 AT1G49980 no_kog_value | FNA.5986                                  | 556               | 81.835   | 2.05E-118 |
| 95a1791d-6956-49dc-ba47-43d40db6a68c_Basecall_Alignment_template-snap.2 AT1G24460 no_kog_value | FNA.7487                                  | 617               | 80.713   | 6.15E-118 |
| b07fd070-5e4e-4084-b045-84b7bfdaa5b8_Basecall_Alignment_template-snap.1 AT5G45660 no_kog_value | FNA.7767                                  | 503               | 82.704   | 7.63E-113 |
| b0f941df-f2b5-4641-bbf4-ea481792474f_Basecall_Alignment_template-snap.5 AT5G41270 no_kog_value | FNA.6353                                  | 549               | 81.421   | 1.20E-110 |
| 6734b3c0-753d-4735-a0e4-eb09bd56fc8c_Basecall_Alignment_template-snap.2 AT4G33160 no_kog_value | FNA.6322                                  | 666               | 78.679   | 5.75E-110 |
| e0fe2314-70dd-4b02-9c58-b7a58c60d0f2_Basecall_Alignment_template-snap.2 AT3G09250 no_kog_value | FNA.6193                                  | 565               | 80.177   | 1.34E-100 |

**Supplementary Table 1 | *ab initio* gene models used in phylogenomic analyses.** Individual reads containing *ab initio* predicted coding sequences, and corresponding mappings to Wickett *et al.* (2014) alignments (based on 1:1 reciprocal best-hit assignment via BLASTN, default parameters).

## Supplementary Discussion

**Rapid generation of data.** Modelling of accumulation curves in simulated species identification by resampling empirical data (see Methods and Figure 3) shows that the precision of each-way BLAST hit biases rapidly stabilises once reads on the order of  $10^3 - 10^4$  have been processed. More simply, a putative species assignment for an unknown sample using RTnS data in *Arabidopsis* would be unlikely to change once this many reads have been sequenced and processed. In our experiment, sample DNA extraction and library preparation combined took around two or fewer hours in every case, and bioinformatic processing took place continuously (using a simple script, executing every five minutes, which completed analysis of each batch of new reads in less than a minute). We suggest that the key performance characteristic for field-sequencing (where species ID is the goal) is therefore peak yield-rate (long reads / unit time), not aggregate yield (total base-pairs sequenced).

In our experiment, the R9 chemistry available at the time (May 2016) gave peak yield-rates in excess of 10,000 reads/hour, more than half of which were long enough for the ID procedures outlined above. It is therefore tractable to ID species in three hours or fewer from tissue collection to identification.

We further suggest that similar behaviour could also be expected for any eukaryotic whole-genome shotgun dataset with similar length distribution characteristics to our data (N50 ~4,400bp) and similar target species divergence (up to 13Mya: Beilstein *et al.* (2010) *PNAS* **107**:18724-8, doi:10.1073/pnas.0909766107; with neutral substitution rates of the order of  $10^{-9}$  substitutions.site<sup>-1</sup>.year<sup>-1</sup>: Kagale *et al.* (2014) *The Plant Cell* **26**:2777 doi:10.1105/tpc.114.126391). These examples concern each-way (reciprocal) ID, where discrimination between two species is required. For cases with three or more target species, comparison using a scalar bias statistic becomes more problematic. However, we note that cumulative bias accumulation curves (see Figure 3d) could be plotted for multiple comparisons. Here the slope parameters would provide a fast, simple and useful way to determine which species database comparison was most likely.

## Supplementary Notes

**Supplementary Note 1 | Illumina MiSeq sequencing runs.** 300bp paired-end libraries were prepared for four samples using the same field-extracted DNA as used for MinION sequencing (AL2a and AT1a), according to the manufacturer's (Illumina, Inc.) standard protocol. Samples AL1a and AL2a (*A. lyrata*) yielded 8,143,010 and 7,048,060 paired reads, respectively, for total yields of 2,451,046,010 base-pairs (bp) and 2,121,466,060bp. Samples AT1a and AT2a (*A. thaliana*) yielded 8,924,824 and 8,033,488 paired reads, respectively, for total yields of 2,686,372,024bp and 2,418,079,8880bp.

**Supplementary Note 2 | Whole-genome shotgun coverage and mapping to reference genomes.** In total, 2.4Gbp of paired NGS reads were sequenced each for *A. thaliana* and *A. lyrata*, equating to approximately 20.2x and 11.8x coverage, respectively, of the available reference genome lengths. Amongst reads that could be directly mapped to these genomes with BWA, average read depths were 19.5x and 13.8x respectively (for *A. lyrata*; 14.9x for *A. lyrata ssp. petraea*).

In total (combining R7.3 and R9 reads, but excluding phage lambda DNA filtered using BLASTN) 240Mbp of data were RTnS-sequenced for *A. thaliana*, and 62Mbp for *A. lyrata*. These yields equate to approximately 2.01x and 0.3x coverage, respectively, of the available reference genome lengths. Amongst reads that could be directly mapped to these genomes with BWA, average read depths were 1.82x and 4.07x respectively (for *A. lyrata*; 4.3x for *A. lyrata ssp. petraea*). Using LAST, RTnS *A. thaliana* reads aligned to 54.7Mbp of the TAIR10 genome (46% of the total genome length) with an average nominal alignment accuracy of 78.4%. Similar (77% accuracy) was observed amongst RTnS *A. lyrata* reads mapped with LAST to the *A. lyrata* or *A. lyrata ssp. petraea* draft genomes, though many fewer reads could be mapped (0.9Mbp).
